# Supplementary material for: The role of pre-pregnancy overweight in gestational diabetes, hypertension, and macrosomia: a retrospective study
Source: PeerJ journal article supplement (doi:10.7717/peerj.20277), 2025-11-03
Supplement: data.xlsx [file data.xlsx]

## Sheet: data
No	age	Education Secondary school and below Junior college Undergraduate and above	Occupation Sedentary work Moderate physical activity work Physically demanding work	Smoking No Passive smoking Yes	Alcohol consumption No Yes	GHp	GDM	Preterm birth	Delivery mode Spontaneous vaginal delivery Cesarean section Operative vaginal delivery	Low birth weight infant	Macrosomia	BMI	overweight
1	24	3	1	0	0	0	0	0	0	1	0	23.62	0
2	25	1	2	0	1	0	0	0	1	0	0	18.06	0
3	29	3	1	0	0	0	0	0	1	0	0	18.42	0
4	26	3	1	0	0	0	0	0	2	0	0	21.67	0
5	31	2	1	0	0	1	0	0	0	0	0	24.8	1
6	25	3	1	0	0	0	0	0	1	0	0	21.26	0
7	25	3	1	0	0	0	0	1	1	0	0	21.48	0
8	26	3	1	0	0	0	0	0	0	0	0	21.79	0
9	26	3	1	0	0	1	1	0	0	0	0	19.72	0
10	26	2	1	0	0	0	0	0	2	0	0	18.78	0
11	24	3	1	0	0	0	0	0	1	0	0	23.44	0
12	24	2	1	0	0	0	0	0	0	0	0	24.46	1
13	25	2	1	0	0	0	0	0	1	0	1	25.11	1
14	23	3	1	1	0	0	0	1	1	0	0	19.53	0
15	25	3	2	0	0	0	0	0	0	0	0	20.4	0
16	26	3	1	0	0	0	0	0	0	0	0	18.78	0
17	24	3	1	0	0	0	0	0	0	0	0	20.01	0
18	22	3	1	0	0	0	0	0	1	0	0	22.03	0
19	26	3	1	0	0	0	0	0	1	0	0	22.26	0
20	23	2	1	0	0	0	0	0	1	0	0	18.29	0
21	26	3	1	0	0	0	0	0	0	0	0	18.31	0
22	31	2	1	0	1	0	0	0	1	0	0	20.5	0
23	23	3	1	0	0	0	0	0	1	0	0	24.61	1
24	31	1	1	0	0	0	0	0	0	0	1	19.53	0
25	26	2	1	0	0	0	0	0	0	0	0	19.53	0
26	23	2	1	0	0	1	0	0	0	0	0	26.08	1
27	29	3	1	1	0	0	0	0	1	0	0	23.05	0
28	23	3	1	0	0	1	0	0	1	0	0	26.67	1
29	26	3	1	0	0	0	0	0	0	0	0	19.29	0
30	25	2	1	0	0	0	0	0	0	0	0	21.64	0
31	24	3	2	0	0	0	0	0	1	0	0	17.58	0
32	27	3	1	0	0	0	0	0	0	0	1	19.13	0
33	25	3	2	0	0	0	0	0	0	0	0	19.14	0
34	28	2	3	0	0	0	0	0	1	0	0	19.76	0
35	29	3	1	0	0	0	0	0	0	0	0	19.14	0
36	27	2	1	0	0	0	0	0	1	0	0	18.22	0
37	34	3	2	0	0	0	0	0	0	0	0	18.22	0
38	24	3	2	0	0	0	0	0	0	0	0	19.57	0
39	28	2	1	0	0	1	0	1	0	0	0	22.27	0
40	25	3	1	0	0	0	0	0	1	0	0	17.53	0
41	28	3	1	0	0	0	0	0	1	0	0	18.37	0
42	26	1	2	0	0	0	0	0	0	0	0	24.77	1
43	29	2	2	0	0	0	1	0	1	0	0	24.65	1
44	25	3	1	0	0	0	0	0	0	0	0	22.66	0
45	34	3	1	0	0	0	0	0	0	0	0	17.26	0
46	27	3	1	0	0	0	0	0	1	0	0	20.81	0
47	25	1	1	0	0	0	0	0	0	0	0	20.03	0
48	32	3	1	0	0	0	0	0	1	0	0	20.19	0
49	25	2	1	0	0	0	0	0	1	0	0	24.22	1
50	33	1	1	0	0	1	0	1	0	0	1	19.65	0
51	26	2	1	0	0	0	0	0	1	0	0	18.36	0
52	29	3	1	0	0	0	0	1	1	0	0	16.85	0
53	28	3	2	0	0	0	0	0	1	0	0	22.04	0
54	23	1	1	0	0	0	0	0	1	0	0	19.53	0
55	23	3	1	0	0	0	0	0	0	0	0	18.02	0
56	27	2	1	0	0	0	0	0	0	0	0	19.47	0
57	24	2	1	0	0	0	0	0	1	0	0	26.04	1
58	31	1	1	0	0	0	0	0	0	0	1	26.37	1
59	25	3	3	0	0	0	0	0	0	0	0	21.56	0
60	31	3	3	0	0	0	0	0	0	0	0	22.66	0
61	31	3	1	0	0	0	0	0	1	0	0	21.33	0
62	25	2	2	0	0	0	0	0	0	0	0	21.97	0
63	26	2	1	0	0	0	0	0	1	0	0	21.63	0
64	31	3	1	0	0	0	0	0	1	0	0	17.97	0
65	26	1	2	0	0	0	0	0	1	0	0	26.62	1
66	28	3	2	0	0	0	0	0	1	0	0	23.44	0
67	23	3	1	0	0	0	0	0	0	0	0	18.64	0
68	25	2	2	0	0	0	0	0	1	0	0	26.81	1
69	23	2	1	1	0	0	0	0	0	0	0	22.58	0
70	25	2	1	1	0	0	0	0	1	0	0	26.37	1
71	26	2	1	0	0	0	1	0	1	0	1	19.29	0
72	28	3	1	1	0	0	1	0	0	0	0	19.48	0
73	25	3	1	0	0	0	0	0	1	0	0	19.05	0
74	25	2	1	0	1	0	0	0	0	0	0	19.05	0
75	28	3	1	0	0	0	0	0	0	0	0	22.58	0
76	25	2	1	0	0	0	0	1	1	0	1	20.2	0
77	29	3	2	0	0	0	0	0	1	0	0	17.26	0
78	31	3	1	0	0	0	0	0	1	0	0	24.77	1
79	24	3	2	0	0	0	0	0	0	0	0	18.43	0
80	29	3	1	0	0	0	0	0	0	1	0	21.48	0
81	26	3	1	0	0	0	0	0	0	0	0	15.87	0
82	26	3	2	0	1	0	1	0	0	0	0	20.45	0
83	26	3	1	0	0	0	0	0	0	0	0	19.63	0
84	27	3	1	0	0	0	0	0	1	1	0	20.31	0
85	22	3	1	2	0	0	0	0	0	0	0	25.6	1
86	24	3	1	0	0	0	0	0	0	0	0	20.2	0
87	31	2	1	0	0	0	0	0	0	0	0	18.82	0
88	25	1	1	0	0	1	0	0	0	0	1	22.58	0
89	24	2	1	0	0	0	0	0	1	0	0	21.88	0
90	22	2	1	0	0	0	0	1	1	0	0	25.4	1
91	28	2	1	0	0	0	0	0	0	0	0	20.31	0
92	23	3	1	0	1	0	0	0	1	0	0	21.88	0
93	24	3	2	0	0	0	0	0	0	0	0	19.81	0
94	25	3	1	0	0	0	0	0	1	0	0	20.44	0
95	31	3	1	0	0	0	0	0	1	0	0	21.64	0
96	26	2	2	0	0	0	0	0	1	0	0	18.9	0
97	26	1	2	0	0	1	0	1	2	0	0	25.39	1
98	26	2	1	0	0	0	0	0	0	1	0	20.43	0
99	28	2	1	0	0	0	0	0	1	0	0	19.81	0
100	26	2	1	0	0	0	0	0	0	0	0	18.99	0
101	25	3	2	0	0	0	0	0	0	0	0	19.57	0
102	34	3	1	0	0	1	0	0	0	0	0	21.36	0
103	28	3	1	0	0	0	1	1	1	0	0	18.02	0
104	23	3	1	0	0	0	0	0	0	0	0	19.47	0
105	26	3	2	0	0	0	0	1	1	0	0	21.33	0
106	24	2	1	0	0	0	0	0	1	0	1	20.08	0
107	28	3	1	0	0	1	0	0	1	0	0	24.34	1
108	26	3	1	0	0	0	0	0	1	0	0	20.44	0
109	23	2	1	0	0	0	0	0	0	0	1	18.43	0
110	32	1	2	0	0	0	0	0	0	0	0	16.23	0
111	26	2	1	0	0	0	0	0	0	0	0	19.53	0
112	26	3	1	0	0	0	0	0	0	0	1	24.61	1
113	32	3	1	0	0	0	0	0	1	0	0	20.2	0
114	25	3	1	0	0	0	0	0	0	0	0	19.98	0
115	28	3	1	0	0	0	0	0	0	0	0	21.26	0
116	28	2	1	0	0	0	0	0	0	0	0	19.63	0
117	28	2	1	2	0	0	0	0	1	0	0	24.17	1
118	29	2	1	0	0	0	0	0	0	0	0	23.87	0
119	25	3	1	0	0	0	0	0	1	0	0	24.56	1
120	24	3	1	0	0	0	1	0	1	0	0	19.23	0
121	26	3	1	0	0	1	1	0	0	0	0	24.77	1
122	28	3	1	0	0	0	0	0	1	0	0	19.1	0
123	31	2	1	0	0	0	1	1	1	0	0	19.81	0
124	31	1	3	0	0	0	0	0	0	0	0	24.03	1
125	35	1	1	0	0	0	1	1	0	0	0	18.59	0
126	23	3	1	0	0	0	0	0	1	0	0	19.68	0
127	26	2	1	0	0	0	0	0	0	0	0	17.69	0
128	27	2	1	0	0	0	0	0	0	0	0	18.66	0
129	26	3	1	0	0	0	0	0	0	0	0	16.82	0
130	22	3	1	0	0	0	0	0	0	0	0	21.3	0
131	26	3	1	0	0	0	0	0	0	0	0	21.93	0
132	28	3	2	0	0	0	0	0	0	0	0	22.31	0
133	24	3	1	0	0	0	0	0	1	0	0	19.56	0
134	24	2	1	0	0	1	0	0	1	0	0	18.82	0
135	24	2	1	0	0	0	0	0	1	0	0	23.73	0
136	29	3	2	1	0	0	0	0	0	0	1	22.06	0
137	26	3	1	0	0	0	0	1	0	0	0	16.82	0
138	28	3	1	0	0	0	0	0	0	0	0	23.31	0
139	23	3	1	0	0	0	0	0	0	0	0	18.36	0
140	32	1	1	0	0	0	0	0	0	0	0	17.23	0
141	28	1	2	0	0	0	0	0	0	0	0	20.96	0
142	25	3	1	0	0	0	0	0	0	0	0	21.6	0
143	28	2	1	0	0	0	0	0	0	0	0	23.03	0
144	26	2	1	0	0	0	0	0	0	0	0	21.08	0
145	25	2	1	0	0	0	0	0	0	0	0	18.02	0
146	25	3	1	0	0	0	0	0	1	0	0	19.43	0
147	23	3	1	0	0	0	0	0	0	0	0	21.48	0
148	34	3	1	0	0	0	0	0	1	0	0	19.05	0
149	26	3	1	0	0	1	1	0	0	0	0	18.83	0
150	28	2	1	0	0	0	0	0	0	0	0	17.31	0
151	25	2	1	0	0	0	0	0	0	0	0	18.29	0
152	28	2	1	0	0	0	0	0	0	0	0	17.15	0
153	26	3	2	0	0	0	0	0	0	0	0	27.01	1
154	23	3	1	0	0	0	0	0	0	0	0	15.43	0
155	24	3	1	0	0	0	0	0	0	0	0	22.31	0
156	27	2	1	0	0	0	0	0	0	0	0	22.43	0
157	22	3	3	0	0	0	1	0	0	0	0	25.21	1
158	26	3	1	0	0	0	0	0	1	0	1	21.08	0
159	25	3	1	0	1	0	1	0	0	0	0	30.22	1
160	27	2	1	0	0	0	0	0	1	0	0	24.22	1
161	25	3	1	0	0	0	0	0	0	0	0	22.6	0
162	25	1	1	0	0	0	0	0	0	1	0	20.43	0
163	26	2	1	0	0	0	0	0	1	0	0	25.1	1
164	25	3	1	1	0	1	0	0	1	0	0	25.44	1
165	23	3	1	0	0	0	0	0	0	0	0	20.03	0
166	24	2	1	0	0	0	0	0	1	0	0	22.6	0
167	26	1	1	0	0	0	0	0	1	0	0	23.12	0
168	31	1	1	0	1	0	0	0	0	0	0	23.33	0
169	24	2	1	0	0	0	0	0	1	0	0	18.96	0
170	27	3	1	0	0	0	0	0	0	0	0	24.97	1
171	24	3	1	0	0	0	0	0	1	0	0	16.41	0
172	26	3	1	0	1	0	0	0	0	0	1	18.44	0
173	27	3	1	0	0	0	0	0	0	0	0	17.75	0
174	25	3	1	0	0	0	0	0	0	0	0	22.89	0
175	23	2	1	0	0	0	1	1	0	0	0	22.6	0
176	25	1	2	0	0	0	0	0	0	0	0	22.04	0
177	27	2	1	0	1	0	0	0	0	0	0	20.2	0
178	25	2	1	0	0	0	1	0	0	0	0	24.86	1
179	29	3	1	0	0	0	0	0	0	0	0	21.77	0
180	28	3	1	0	0	0	0	0	0	0	0	20.7	0
181	26	3	1	1	0	0	0	0	0	0	0	20.31	0
182	28	2	1	0	0	0	0	0	0	0	0	17.58	0
183	25	3	2	0	1	0	0	0	1	0	0	19.13	0
184	25	3	1	0	0	0	0	0	0	0	0	19.53	0
185	26	3	1	0	0	0	0	0	0	0	0	18.65	0
186	31	3	2	0	0	0	0	0	1	0	0	17.53	0
187	31	3	1	0	0	0	0	0	0	0	0	19.05	0
188	23	1	2	1	0	0	1	0	0	0	0	26.04	1
189	29	3	1	0	0	0	0	0	1	0	0	19.49	0
190	29	3	1	0	0	0	1	0	0	0	0	18.52	0
191	26	3	1	0	0	0	0	0	0	0	0	19.19	0
192	25	3	1	0	0	0	0	0	0	1	0	23.44	0
193	26	2	2	0	0	0	0	0	0	1	0	20.43	0
194	33	2	1	0	0	0	0	0	0	0	0	27.1	1
195	25	3	1	0	0	0	0	0	0	0	0	18.13	0
196	32	1	1	1	0	0	0	0	0	0	0	20	0
197	23	1	1	0	0	0	0	0	1	0	0	24.45	1
198	31	3	1	0	0	0	0	0	1	0	0	24.66	1
199	27	2	1	0	0	0	0	0	0	0	0	23.44	0
200	30	2	2	0	1	0	0	0	0	0	0	19.02	0
201	27	1	1	0	0	0	0	0	0	0	0	18.36	0
202	28	1	1	0	0	0	0	0	1	0	0	19.98	0
203	26	3	1	0	0	0	0	0	1	0	0	18.03	0
204	24	2	1	0	0	0	0	0	0	0	0	24.34	1
205	25	1	1	0	0	0	0	0	1	0	0	24.84	1
206	26	2	2	0	0	0	0	0	1	0	0	16.39	0
207	25	2	1	0	0	0	0	0	1	0	0	19.15	0
208	25	3	1	0	0	0	1	0	0	0	0	17.63	0
209	26	3	1	0	0	0	0	0	0	0	0	17.31	0
210	26	3	1	0	0	0	0	0	0	0	0	26.77	1
211	29	2	1	0	0	0	0	0	0	1	0	19.57	0
212	29	2	1	0	0	0	0	0	1	0	0	19.65	0
213	32	1	2	0	0	0	0	0	0	0	0	19.53	0
214	23	3	1	0	0	0	0	0	0	0	0	19.71	0
215	22	2	1	0	0	0	0	0	1	0	0	16.65	0
216	25	2	1	1	0	0	0	0	0	0	0	18.66	0
217	35	2	1	0	0	0	0	0	1	0	0	23.87	0
218	29	2	1	0	0	0	0	0	0	0	0	20.45	0
219	27	1	2	0	1	0	1	0	0	0	0	27.22	1
220	25	3	1	0	0	0	0	0	1	0	1	18.44	0
221	25	3	1	0	0	0	0	0	1	0	0	24.77	1
222	24	3	1	0	0	0	0	0	1	0	0	19.53	0
223	23	3	1	0	0	1	0	0	0	0	1	31.09	1
224	28	1	1	0	0	0	1	0	1	0	0	21.87	0
225	27	2	1	0	0	0	0	0	0	1	0	19.53	0
226	31	2	3	0	0	0	0	0	0	0	0	25.32	1
227	27	2	1	0	0	0	1	0	0	0	0	18.25	0
228	29	3	1	0	0	0	0	0	0	0	0	19.61	0
229	26	2	1	0	0	0	0	0	1	0	0	17.53	0
230	28	3	1	0	0	0	0	0	0	0	0	20.03	0
231	26	2	1	0	0	0	0	0	1	0	0	18.83	0
232	23	2	1	0	0	1	0	0	0	0	0	20.66	0
233	25	3	1	2	0	0	0	0	0	0	0	22.04	0
234	28	2	1	0	0	0	0	0	1	0	0	19.53	0
235	27	3	1	0	0	0	0	0	1	0	0	21.48	0
236	28	3	2	1	0	0	0	0	0	0	0	18.29	0
237	24	2	1	1	0	0	0	0	1	0	0	24.03	1
238	26	2	1	0	0	0	0	0	2	0	0	22.03	0
239	28	3	1	0	0	0	0	0	1	0	0	18.43	0
240	24	3	1	0	0	0	1	0	0	0	0	18.82	0
241	28	3	1	0	0	0	0	0	1	0	1	18.67	0
242	25	3	1	0	0	0	0	0	0	0	0	23.44	0
243	22	3	1	0	0	0	0	0	0	0	0	18.22	0
244	31	3	1	0	0	0	0	0	1	0	0	18.99	0
245	30	3	1	0	0	0	0	0	0	0	0	16.02	0
246	33	3	1	0	0	0	0	0	1	0	0	20.7	0
247	27	3	1	0	0	0	0	0	0	0	0	23.44	0
248	25	1	2	0	1	0	1	0	1	0	0	26.67	1
249	32	3	1	0	0	0	0	0	1	0	0	17.86	0
250	31	2	3	0	0	0	0	0	0	0	0	26.17	1
251	21	3	1	0	0	1	0	1	0	0	0	23.53	0
252	26	2	1	0	0	0	0	0	1	0	1	19.15	0
253	27	1	2	0	0	0	0	0	0	0	0	17.24	0
254	24	2	1	0	0	0	0	0	0	0	0	16.8	0
255	26	1	1	0	1	1	0	0	1	0	0	17.26	0
256	27	3	1	0	0	0	0	0	0	0	0	23.01	0
257	26	2	1	0	0	0	0	0	0	0	0	19.11	0
258	24	1	1	0	0	0	1	0	0	0	0	25.4	1
259	27	1	1	1	0	0	0	0	0	0	1	24.14	1
260	27	2	1	0	0	0	1	0	1	0	1	17.23	0
261	28	2	1	0	0	0	0	0	0	0	0	22.86	0
262	29	2	1	0	0	0	0	0	0	0	0	20.32	0
263	26	1	1	0	1	0	0	0	0	0	0	19.47	0
264	32	3	3	0	0	0	0	0	1	0	0	20.43	0
265	25	1	2	0	0	0	0	0	1	0	0	18.73	0
266	26	3	1	0	0	0	0	0	0	0	0	19.83	0
267	28	2	2	0	0	0	0	0	0	0	0	20.2	0
268	28	3	1	0	0	0	0	0	0	0	0	20.06	0
269	24	1	1	0	0	0	0	0	0	0	0	19.29	0
270	27	3	1	0	0	0	0	0	0	0	0	27.34	1
271	31	3	1	0	0	0	0	0	0	0	0	17.06	0
272	25	2	2	0	0	0	0	1	0	0	1	24.77	1
273	35	3	1	0	0	0	0	0	0	0	0	15.99	0
274	30	2	1	1	0	0	0	0	0	0	0	30.43	1
275	26	2	2	0	0	0	0	0	0	0	0	19.57	0
276	26	2	1	0	0	0	0	0	0	0	0	22.04	0
277	25	2	1	0	0	0	0	0	0	0	0	24.98	1
278	27	3	1	0	0	0	0	0	1	0	0	25.39	1
279	31	1	1	1	0	0	0	0	0	0	0	17.78	0
280	30	3	2	0	0	0	0	1	0	0	0	20.57	0
281	27	2	1	0	0	0	0	0	0	0	0	20.76	0
282	27	3	2	1	0	0	1	0	1	0	0	27.53	1
283	26	3	1	0	0	0	0	0	0	0	0	23.63	0
284	35	2	1	0	1	0	0	0	0	0	0	19.13	0
285	23	2	2	0	1	0	1	0	1	0	0	26.67	1
286	24	2	1	0	0	0	0	0	0	0	0	22.03	0
287	29	2	1	0	0	0	0	0	0	0	0	19.13	0
288	26	3	1	0	0	0	0	0	1	0	1	19.53	0
289	25	1	1	0	0	1	0	0	0	0	0	19.53	0
290	21	3	1	0	0	0	0	0	0	0	0	22.06	0
291	26	3	1	0	0	0	0	0	0	0	0	22.66	0
292	22	3	1	0	0	0	0	0	0	0	1	28.23	1
293	28	3	1	0	0	0	0	0	0	0	0	22.49	0
294	26	3	1	0	0	0	0	0	0	1	0	18.67	0
295	26	3	1	0	0	0	0	0	0	0	0	21.36	0
296	31	3	1	0	0	0	0	0	1	0	0	20.69	0
297	25	1	1	0	0	0	0	0	0	0	0	24.77	1
298	31	2	1	0	0	0	1	0	0	0	0	20.31	0
299	28	3	1	0	0	0	0	0	1	0	0	17.85	0
300	25	3	1	0	0	0	0	0	0	0	0	22.03	0
301	29	1	1	0	0	0	0	0	0	0	0	20.45	0
302	26	2	1	0	0	0	0	0	0	0	0	18.9	0
303	25	3	1	0	0	0	0	0	1	0	0	21.48	0
304	23	3	1	0	0	0	0	0	0	0	1	19.53	0
305	26	2	1	1	0	0	0	0	0	0	0	25.22	1
306	26	3	1	0	0	0	0	0	1	0	0	18.07	0
307	25	3	1	0	0	0	0	0	0	0	0	25.63	1
308	24	2	1	0	0	0	1	0	0	0	0	17.57	0
309	24	1	1	0	0	0	0	0	0	0	0	19	0
310	28	2	1	0	0	0	0	0	1	0	0	24.46	1
311	25	2	1	0	0	0	0	0	0	0	0	25.44	1
312	27	3	1	0	0	1	0	0	1	0	0	25.21	1
313	25	1	1	0	0	0	1	0	0	0	0	19.53	0
314	25	2	2	0	0	0	0	0	0	1	0	26.35	1
315	27	3	1	0	0	0	0	0	0	0	0	22.06	0
316	27	2	1	0	0	0	0	0	0	0	0	16.59	0
317	25	1	1	0	0	0	0	1	0	0	0	18.07	0
318	25	3	3	0	0	0	0	0	0	0	0	19.72	0
319	31	3	1	0	0	0	0	0	1	0	0	18.73	0
320	25	3	1	0	0	0	0	0	0	0	0	24.03	1
321	23	2	1	0	0	0	0	0	0	0	0	28.61	1
322	25	3	1	0	1	0	0	0	0	0	0	18.43	0
323	25	3	2	0	0	0	0	0	1	0	0	19.83	0
324	23	3	1	0	0	0	0	0	0	0	0	21.97	0
325	25	3	1	0	0	0	0	0	0	0	0	18.43	0
326	21	1	1	0	0	0	0	0	1	0	0	18.82	0
327	22	2	1	0	0	0	0	0	0	0	0	21.3	0
328	27	3	1	0	0	0	0	0	1	0	0	18.83	0
329	28	3	2	0	1	0	0	0	0	0	1	26.81	1
330	25	3	2	0	0	0	1	0	1	0	0	22.27	0
331	27	1	1	0	0	1	0	0	0	0	0	19.56	0
332	26	3	1	0	0	0	0	0	0	0	0	19.63	0
333	27	3	2	0	0	0	0	0	1	0	0	19.47	0
334	27	3	1	0	0	0	0	0	0	0	1	22.04	0
335	26	2	1	0	0	0	0	0	0	0	0	18.73	0
336	26	3	1	0	0	0	0	0	1	0	0	21.09	0
337	24	3	1	0	0	0	0	0	0	0	0	18.03	0
338	23	3	1	0	1	0	0	0	0	0	0	18.43	0
339	27	2	1	0	0	0	0	0	0	0	0	22.95	0
340	28	1	1	0	0	1	0	0	1	0	0	20.03	0
341	22	1	2	0	0	0	0	0	0	0	1	19.83	0
342	32	3	2	0	0	0	0	0	1	0	0	20.81	0
343	24	3	1	0	0	0	0	0	1	0	0	19.72	0
344	35	3	1	1	0	1	0	0	0	0	0	21.09	0
345	29	3	1	0	1	0	1	1	1	0	0	19.03	0
346	23	3	1	0	0	0	0	0	1	0	0	20.81	0
347	25	3	1	0	0	0	0	0	0	0	0	16.56	0
348	32	2	2	0	0	0	0	0	0	0	0	19.33	0
349	27	1	1	0	0	0	0	0	0	1	0	19.63	0
350	26	2	1	0	0	0	0	0	1	0	0	20.5	0
351	27	2	1	0	0	0	0	0	0	0	0	18.9	0
352	28	3	1	0	0	1	0	0	0	0	0	22.77	0
353	26	3	1	0	0	0	0	0	0	0	0	24.84	1
354	31	2	2	0	0	0	0	0	1	0	0	22.58	0
355	28	2	1	0	0	0	0	0	0	0	0	20.32	0
356	32	2	1	0	0	0	0	0	0	0	0	18.83	0
357	24	3	3	0	0	0	0	0	1	0	0	21.08	0
358	23	3	1	0	0	0	0	0	0	0	0	24.66	1
359	28	1	1	0	0	0	0	0	1	0	1	21.48	0
360	26	1	1	0	0	0	0	0	1	0	0	23.71	0
361	29	3	1	0	0	0	0	0	0	0	0	21.87	0
362	25	3	1	0	0	0	0	0	0	0	0	18.73	0
363	24	3	1	0	0	0	0	0	0	0	0	20.4	0
364	31	2	1	0	0	0	1	0	1	0	0	20.2	0
365	32	2	1	0	0	0	0	1	1	0	0	23.63	0
366	32	3	1	0	0	0	0	0	0	0	0	19.56	0
367	22	2	1	0	0	0	0	0	1	0	0	24.22	1
368	26	2	1	0	0	0	1	0	0	0	0	27.34	1
369	22	3	1	0	0	0	0	0	0	0	0	18.83	0
370	25	3	1	1	0	0	0	0	1	0	1	27.34	1
371	29	1	3	0	0	0	0	0	0	0	0	17.31	0
372	29	1	1	2	1	0	0	0	0	0	0	21.23	0
373	25	2	1	1	0	0	0	0	0	0	0	24.17	1
374	25	3	1	0	0	1	0	0	1	0	0	24.8	1
375	26	3	2	0	0	0	0	0	0	1	0	23.33	0
376	29	2	1	0	0	0	0	0	0	0	0	24.77	1
377	27	3	1	0	0	0	0	0	0	0	0	26.04	1
378	23	2	1	0	0	1	1	0	0	0	1	31.22	1
379	24	3	2	0	0	0	0	0	0	0	0	17.85	0
380	31	2	1	0	0	0	0	0	0	1	0	20.45	0
381	24	1	2	0	0	0	0	0	0	0	0	18.73	0
382	25	1	1	0	1	0	0	0	0	0	0	19.53	0
383	28	3	1	0	0	0	0	0	1	0	0	22.32	0
384	29	2	1	0	0	0	0	0	0	0	0	19.13	0
385	28	3	1	0	1	0	0	0	0	0	0	21.48	0
386	23	3	2	0	0	0	0	0	0	0	0	19.83	0
387	31	3	1	0	0	0	0	0	0	0	0	19.71	0
388	24	3	1	0	0	0	1	0	1	0	0	23.53	0
389	27	3	2	0	0	0	0	0	1	0	0	23.53	0
390	25	2	1	1	1	0	0	0	0	0	0	29.71	1
391	25	3	2	0	1	1	0	0	0	0	0	20.03	0
392	26	3	1	0	0	0	0	0	0	0	0	20.32	0
393	26	2	1	0	0	0	0	0	0	0	0	20.08	0
394	26	3	1	2	0	0	0	0	0	0	0	19.63	0
395	27	3	1	0	0	0	0	0	0	0	0	19.13	0
396	29	3	1	0	0	0	0	0	0	0	0	21.48	0
397	25	3	1	0	0	0	0	0	0	0	0	21.48	0
398	29	3	1	0	0	0	0	0	0	0	0	21.3	0
399	26	2	1	0	0	0	0	0	1	0	0	18.55	0
400	28	3	1	0	0	0	0	0	1	0	1	23.44	0
401	26	3	1	0	1	0	0	0	0	0	0	18.75	0
402	21	2	1	0	0	0	0	0	0	0	0	19.14	0
403	26	3	1	0	0	0	0	0	1	0	0	21.83	0
404	23	3	1	0	0	0	0	0	1	0	0	17.58	0
405	24	3	1	0	0	0	0	0	0	0	0	24.46	1
406	27	3	1	0	0	0	0	0	0	0	0	19.78	0
407	24	3	1	0	0	0	0	0	0	0	1	22.86	0
408	25	3	1	0	0	0	0	0	1	0	0	21.88	0
409	28	3	1	0	0	0	0	0	1	0	0	18.66	0
410	34	3	1	1	0	0	0	0	0	0	0	19.78	0
411	26	3	1	0	0	0	0	0	1	0	0	17.91	0
412	26	3	1	0	0	0	0	0	0	0	0	23.23	0
413	25	3	2	0	0	0	0	0	0	0	0	20.28	0
414	26	2	1	0	0	1	0	0	1	0	0	20.03	0
415	32	3	1	0	0	0	1	0	0	1	0	19.23	0
416	24	3	1	0	1	0	1	1	0	0	0	27.64	1
417	31	3	1	0	0	0	0	0	0	0	0	17.19	0
418	29	1	1	0	0	0	0	0	0	0	0	16.9	0
419	26	1	1	1	0	0	0	0	1	0	0	18.59	0
420	27	3	1	0	1	0	0	0	1	0	0	18.03	0
421	27	3	2	0	0	0	0	0	1	0	0	21.77	0
422	29	3	1	0	0	0	0	0	1	0	0	19.49	0
423	28	1	1	0	0	0	0	0	0	0	1	16.94	0
424	24	2	1	0	0	0	0	0	1	0	1	24.17	1
425	27	3	1	0	0	0	0	0	1	0	0	19.96	0
426	26	3	1	0	0	0	0	0	1	0	0	21.48	0
427	27	3	1	0	0	0	0	0	1	0	0	21.64	0
428	25	3	1	0	0	0	0	0	0	0	0	19.53	0
429	25	3	1	0	0	0	0	1	1	1	0	24.35	1
430	26	3	1	0	0	0	0	0	0	0	0	17.31	0
431	29	3	1	1	0	0	0	0	1	0	0	22.04	0
432	32	2	2	0	0	0	1	0	0	0	0	22.66	0
433	28	3	1	0	1	0	0	0	0	0	0	18.36	0
434	26	2	1	0	0	0	0	0	0	0	0	19.14	0
435	35	2	1	0	1	0	0	0	0	0	0	22.03	0
436	24	2	2	0	0	0	0	0	1	0	0	24.84	1
437	26	3	1	0	0	0	0	0	0	0	0	19.1	0
438	28	2	1	0	0	0	0	1	0	0	1	18.29	0
439	25	3	1	0	0	0	0	0	1	0	0	20.96	0
440	23	3	2	1	0	1	0	0	0	0	0	21.23	0
441	22	2	1	0	0	0	0	0	0	0	0	24.77	1
442	28	3	1	1	0	0	0	0	1	0	0	24.51	1
443	26	3	1	0	0	0	0	0	0	0	0	21.26	0
444	32	3	1	0	0	0	0	0	0	0	0	22.41	0
445	28	3	1	0	0	0	0	0	1	0	0	20.2	0
446	30	1	1	0	0	0	0	0	0	0	0	23.59	0
447	29	3	1	0	0	0	0	0	1	0	0	24.14	1
448	25	3	1	2	0	0	0	0	0	0	0	23.05	0
449	31	3	1	0	0	0	0	0	1	0	0	24.22	1
450	29	3	1	0	1	0	0	0	0	0	0	21.26	0
451	23	3	1	0	0	0	0	0	0	0	0	17.69	0
452	23	3	1	0	0	0	0	0	0	0	0	21.72	0
453	28	3	1	0	0	0	0	0	1	0	0	16.02	0
454	25	3	3	0	0	0	0	0	1	0	0	21.79	0
455	27	1	1	1	0	0	0	0	1	0	0	19.57	0
456	28	1	1	0	0	0	0	0	0	0	0	20.7	0
457	26	3	1	1	1	0	0	0	0	0	0	21.19	0
458	29	2	1	0	0	0	0	0	1	0	1	18.22	0
459	30	3	2	0	0	0	0	0	0	0	0	21.99	0
460	26	2	1	0	0	0	0	0	1	0	0	20.03	0
461	27	1	1	0	0	0	0	0	1	0	0	21.65	0
462	26	1	1	0	0	0	0	0	0	0	0	19.03	0
463	35	2	1	0	0	0	0	0	1	0	0	16.13	0
464	28	3	2	1	0	0	0	0	0	0	0	18.82	0
465	28	3	1	0	0	0	0	0	1	0	0	23.49	0
466	26	1	1	2	0	1	0	0	1	0	0	26.08	1
467	24	3	2	0	0	0	0	0	0	0	0	20.2	0
468	24	3	2	0	0	0	0	0	1	0	0	17.26	0
469	28	2	3	0	0	0	0	0	0	0	0	16.23	0
470	26	1	1	0	0	0	0	0	0	0	0	18.03	0
471	27	3	2	0	0	0	0	0	0	0	0	19.84	0
472	27	1	1	0	1	0	0	0	0	0	0	18.31	0
473	25	3	1	0	0	0	0	0	0	0	0	23.42	0
474	33	2	1	1	0	0	0	0	0	0	0	18.07	0
475	26	2	1	1	0	0	0	1	1	0	0	21.64	0
476	26	3	2	0	0	0	0	0	0	0	0	18.9	0
477	31	1	1	0	1	0	0	0	0	0	0	21.94	0
478	29	1	1	0	0	0	0	0	1	0	0	19.14	0
479	29	3	2	0	0	0	0	0	1	0	0	24.98	1
480	25	1	1	0	0	0	0	1	0	0	0	19.1	0
481	25	3	1	0	0	0	0	1	0	0	0	24.46	1
482	25	3	1	0	1	0	0	0	0	0	0	20.31	0
483	28	3	1	2	0	0	1	0	1	0	0	17.9	0
484	26	2	2	1	0	0	0	0	0	0	0	24.84	1
485	26	3	1	0	0	0	0	0	0	0	0	22.66	0
486	23	3	1	0	0	0	0	0	0	0	0	22.04	0
487	25	3	1	0	0	1	0	0	0	0	0	18.07	0
488	34	2	1	0	0	0	0	0	0	0	0	21.48	0
489	34	3	1	0	0	0	0	0	0	0	0	19.84	0
490	22	2	1	0	0	0	0	0	0	0	0	21.72	0
491	30	2	1	0	0	0	0	0	0	0	0	16.53	0
492	25	3	1	0	0	1	1	0	1	0	0	30.02	1
493	23	3	1	0	0	0	0	0	1	0	0	19.72	0
494	26	3	1	0	0	0	0	0	1	0	0	22.03	0
495	21	3	1	0	0	0	0	1	0	0	0	19.14	0
496	28	2	1	0	0	0	0	0	1	0	0	17.09	0
497	27	1	1	0	0	0	0	0	0	0	0	24.8	1
498	23	3	2	0	0	1	0	0	1	0	0	17.97	0
499	23	3	2	0	0	0	0	0	1	0	0	23.44	0
500	23	1	2	0	1	0	0	0	0	0	0	18.83	0
501	25	3	1	0	0	0	0	0	0	0	0	21.09	0
502	25	3	1	0	0	0	0	0	1	0	0	19.43	0
503	25	2	3	0	0	0	0	0	0	0	0	21.26	0
504	28	3	1	2	1	0	0	0	0	0	0	20.83	0
505	26	2	2	0	0	0	0	0	1	0	1	20.55	0
506	25	1	2	0	0	0	0	0	1	0	1	19.23	0
507	31	3	1	0	0	0	0	0	1	0	0	22.6	0
508	25	1	1	0	0	0	1	0	0	0	0	33.33	1
509	28	2	2	0	0	0	0	0	0	0	0	22.04	0
510	28	3	1	0	0	0	0	0	1	0	0	17.94	0
511	26	3	2	0	0	0	0	0	0	0	0	19.53	0
512	28	3	2	0	0	0	0	0	1	0	0	20.29	0
513	24	3	1	0	1	0	0	0	1	0	0	20.03	0
514	28	3	1	0	0	1	1	0	1	0	0	26.08	1
515	34	3	1	1	0	0	0	0	0	0	0	20.2	0
516	27	3	1	0	0	0	0	0	0	0	0	21.49	0
517	35	2	1	0	0	0	0	0	0	0	0	19.71	0
518	25	3	1	0	0	0	0	0	0	0	0	23.51	0
519	23	3	1	0	0	0	1	0	0	0	0	19.61	0
520	28	3	1	1	0	0	0	0	1	0	0	17.63	0
521	28	1	1	0	1	0	1	0	0	0	0	20.83	0
522	34	3	1	0	0	0	0	0	1	0	0	23.71	0
523	24	3	1	0	0	0	0	0	1	1	0	16.02	0
524	27	3	1	0	0	0	0	0	0	0	0	20.03	0
525	25	3	1	0	0	0	0	0	0	0	0	23.51	0
526	31	2	1	0	1	0	0	0	0	0	0	21.3	0
527	24	3	1	0	0	0	0	0	0	0	0	17.78	0
528	24	3	1	0	0	0	0	0	0	0	0	17.63	0
529	26	1	1	0	0	0	0	0	0	0	0	18.75	0
530	26	3	1	0	0	0	0	0	0	0	0	23.42	0
531	24	3	1	0	0	0	0	0	0	0	0	22.58	0
532	30	2	1	0	0	0	0	0	1	0	0	27.35	1
533	27	3	1	0	0	0	0	0	0	0	0	22.22	0
534	31	2	2	0	0	0	0	0	0	0	0	22.27	0
535	26	2	1	0	0	0	0	0	0	0	0	18.82	0
536	34	3	1	0	1	0	0	0	1	0	0	23.88	0
537	25	3	1	0	0	0	0	0	1	0	1	19.13	0
538	27	3	1	0	0	0	0	0	0	0	0	21.26	0
539	29	1	1	0	1	0	0	0	0	0	0	18.03	0
540	23	3	1	0	0	0	0	0	0	0	0	19.63	0
541	26	3	1	0	0	0	0	0	1	0	0	18.83	0
542	26	3	2	0	0	0	0	1	1	0	0	18.78	0
543	25	2	2	0	0	1	0	0	1	0	0	24.47	1
544	31	3	1	1	0	0	0	0	1	0	0	24.22	1
545	23	3	1	0	0	0	0	0	0	0	0	23.31	0
546	25	3	1	0	0	0	0	0	0	0	0	16.88	0
547	25	3	1	0	0	0	0	0	0	0	0	19.56	0
548	26	3	1	0	0	0	0	0	0	0	0	19.56	0
549	26	2	1	0	0	0	0	0	0	0	0	19.1	0
550	27	1	3	0	0	0	0	0	0	0	0	22.27	0
551	23	3	1	0	0	0	0	0	1	0	0	19.95	0
552	22	2	1	0	0	0	0	0	0	0	0	22.22	0
553	28	3	1	0	0	0	0	0	1	0	0	22.67	0
554	27	3	1	0	0	0	0	0	0	0	0	21.23	0
555	30	3	1	0	0	0	0	0	0	0	0	19.43	0
556	27	3	2	0	0	0	0	0	0	0	0	21.6	0
557	26	1	1	1	0	0	0	0	1	0	0	24.77	1
558	28	3	1	0	0	0	0	0	1	0	0	16.76	0
559	26	3	1	0	0	0	0	0	0	0	0	21.26	0
560	25	2	1	0	0	0	0	0	0	0	0	23.23	0
561	32	1	1	0	0	0	0	0	0	0	0	16.71	0
562	26	3	1	0	0	0	0	0	1	0	0	16.44	0
563	29	1	1	0	0	0	0	0	1	0	0	21.26	0
564	25	3	1	0	1	0	0	0	0	0	0	23.05	0
565	30	1	2	1	0	1	0	0	1	0	0	24.22	1
566	27	2	1	0	0	1	0	0	1	0	0	19.53	0
567	25	2	1	0	0	1	1	0	1	0	0	22.6	0
568	34	3	1	0	0	0	0	0	1	0	0	15.94	0
569	25	3	1	0	0	0	0	0	0	0	0	25.39	1
570	26	2	1	0	0	0	0	0	1	0	0	19.92	0
571	27	3	1	0	0	0	0	0	1	0	0	16.18	0
572	25	2	2	0	0	0	0	0	0	0	1	26.77	1
573	28	2	1	0	0	0	1	0	0	0	0	18.75	0
574	24	2	1	0	0	0	0	0	1	1	0	22.68	0
575	25	2	1	0	0	1	0	1	0	0	0	24.56	1
576	21	3	1	0	0	0	1	1	0	0	0	18.73	0
577	28	3	1	0	0	0	0	0	0	1	0	21.26	0
578	24	3	1	0	0	0	0	0	1	0	0	22.06	0
579	26	3	2	0	0	0	0	0	0	0	0	19.84	0
580	26	2	1	0	0	0	0	0	1	0	0	18.83	0
581	24	3	1	0	1	0	0	0	0	0	0	20.57	0
582	28	1	1	0	0	0	0	0	0	0	0	18.49	0
583	28	2	1	0	0	1	0	0	0	0	0	18.83	0
584	26	1	1	0	0	0	1	0	0	0	0	19.57	0
585	26	2	1	1	0	0	0	0	0	0	0	19.11	0
586	31	3	1	0	0	0	0	0	0	0	0	16.42	0
587	32	3	1	0	0	0	1	1	1	0	0	20.7	0
588	25	3	2	0	0	0	0	0	0	0	0	23.05	0
589	28	2	1	0	0	0	0	0	1	0	0	20.81	0
590	26	3	1	2	0	0	0	0	0	0	0	21.54	0
591	26	3	1	0	0	0	0	0	0	0	0	17.69	0
592	23	2	1	0	0	0	0	0	0	0	0	18.93	0
593	25	3	1	0	0	0	0	0	0	0	0	21.3	0
594	29	1	2	0	0	0	0	0	1	0	0	17.19	0
595	30	3	1	0	0	0	0	0	0	0	0	19.19	0
596	31	3	1	0	0	0	1	0	0	0	0	24.86	1
597	24	3	1	0	0	0	1	0	0	0	0	21.63	0
598	23	3	1	0	0	0	1	0	1	0	0	21.37	0
599	25	2	2	0	0	0	0	0	1	0	0	20.2	0
600	25	3	2	0	0	0	0	0	1	0	0	22.15	0
601	28	3	1	0	1	0	0	0	1	0	0	20.2	0
602	28	3	1	0	0	0	0	0	0	0	1	19.49	0
603	23	1	1	1	0	0	0	0	0	0	0	18.49	0
604	31	3	1	0	0	0	0	0	0	0	0	15.82	0
605	31	2	1	1	1	0	0	0	0	0	0	27.1	1
606	28	2	1	0	1	0	0	0	0	0	0	20.96	0
607	25	2	1	0	0	0	0	0	1	0	0	16.02	0
608	26	2	1	0	0	0	0	0	0	0	0	21.33	0
609	25	3	1	0	0	0	0	0	0	0	0	19.43	0
610	23	3	1	1	0	0	0	1	0	0	0	19.43	0
611	26	3	1	0	0	0	0	0	0	0	0	18.36	0
612	28	1	1	0	0	0	0	0	0	0	0	21.49	0
613	23	3	1	0	0	0	0	0	1	0	0	18.36	0
614	22	3	1	0	0	0	0	0	0	0	0	22.04	0
615	29	3	1	0	0	1	0	0	0	0	1	17.36	0
616	29	3	1	0	0	0	0	0	1	0	0	17.04	0
617	31	2	1	0	0	0	0	0	0	0	0	21.77	0
618	24	2	3	0	1	0	0	0	0	0	0	19.63	0
619	27	3	1	0	0	0	0	1	1	0	0	19.95	0
620	26	3	1	0	0	0	0	0	0	0	0	18.17	0
621	34	3	1	2	0	1	0	0	0	0	0	21.3	0
622	25	3	1	0	0	0	0	0	1	0	0	23.49	0
623	25	2	2	1	0	1	1	0	0	0	0	27.35	1
624	27	1	1	0	0	0	0	0	0	0	0	20.74	0
625	23	2	1	0	0	0	0	1	1	0	0	19.1	0
626	23	3	2	1	0	0	0	0	0	0	0	17.58	0
627	23	3	1	0	0	0	0	0	0	0	1	19.98	0
628	26	3	1	0	0	0	0	0	0	0	0	20.7	0
629	27	3	3	1	0	0	0	0	1	0	0	20.03	0
630	26	2	1	0	0	0	0	0	0	0	0	21.49	0
631	29	3	2	0	1	0	0	0	1	0	0	21.65	0
632	22	3	1	0	0	0	0	0	0	0	0	24.77	1
633	26	3	2	1	0	0	1	0	1	0	0	24.77	1
634	28	3	1	0	0	0	0	0	0	0	0	21.64	0
635	25	3	1	0	0	0	0	0	0	0	0	17.24	0
636	29	2	1	0	0	0	0	0	0	0	0	22.21	0
637	27	3	1	0	0	0	0	0	0	0	0	16.73	0
638	24	3	1	0	0	0	0	0	0	0	0	15.43	0
639	27	3	1	0	0	1	0	0	1	0	0	17.01	0
640	26	3	1	1	0	0	0	0	1	0	0	16.77	0
641	24	3	1	0	0	1	0	0	1	0	0	21.23	0
642	29	1	2	0	0	0	0	0	1	0	0	21.6	0
643	25	2	1	1	0	0	0	0	1	1	0	18.83	0
644	24	2	1	0	0	0	1	0	0	0	0	25.91	1
645	28	3	2	0	0	0	0	0	1	0	0	24.22	1
646	28	3	1	0	1	0	0	0	1	0	0	20.7	0
647	28	3	1	0	0	0	0	0	0	0	0	18.42	0
648	28	1	1	0	0	1	0	0	0	0	0	18.13	0
649	26	1	1	1	0	0	1	0	0	0	0	22.83	0
650	22	3	1	0	0	0	0	0	1	0	0	16.82	0
651	24	3	2	0	0	0	0	0	0	0	0	17.97	0
652	24	3	1	0	0	0	0	0	1	0	0	26.04	1
653	28	1	1	0	0	0	0	0	1	0	0	29.71	1
654	26	3	1	0	1	1	0	0	0	0	0	21.3	0
655	26	3	2	0	0	0	0	0	1	0	0	17.57	0
656	25	2	1	0	0	0	1	0	0	0	1	25.1	1
657	31	3	1	0	0	0	0	0	0	0	0	17.91	0
658	25	2	1	0	0	0	0	0	1	0	0	18.73	0
659	27	3	1	0	0	0	0	0	0	0	0	22.49	0
660	23	2	1	0	0	1	0	0	0	0	0	22.49	0
661	32	1	1	0	0	0	0	0	0	0	0	22.66	0
662	28	2	1	0	0	0	1	0	1	0	0	23.31	0
663	25	3	1	0	0	0	0	0	1	0	0	19.72	0
664	26	3	1	1	0	0	0	0	1	0	0	20.08	0
665	26	1	1	0	0	0	0	0	0	0	0	25.53	1
666	25	2	1	0	0	0	0	0	0	0	0	20.2	0
667	25	2	1	0	0	0	0	0	0	0	0	19.92	0
668	29	3	1	0	0	0	0	0	1	0	0	24.17	1
669	26	3	1	0	0	0	0	0	0	0	0	19.49	0
670	24	1	1	0	0	0	0	0	1	0	0	20.03	0
671	28	2	1	1	0	0	0	0	1	0	0	21.26	0
672	25	3	1	1	0	0	0	0	1	0	0	22.14	0
673	25	2	1	0	0	0	0	0	0	0	0	19.96	0
674	26	2	2	0	0	0	0	0	1	0	0	17.06	0
675	25	2	1	0	0	0	0	0	1	0	0	24.77	1
676	28	3	1	0	0	0	0	0	0	0	0	22.89	0
677	24	3	1	0	1	0	0	0	0	1	0	18.37	0
678	27	3	1	0	0	0	0	1	0	0	0	19.57	0
679	21	3	1	0	0	0	0	0	0	0	0	19.84	0
680	25	3	1	0	0	0	0	0	0	0	0	20.2	0
681	28	2	1	0	1	0	0	0	0	0	0	20.52	0
682	26	1	1	0	0	0	0	0	0	0	0	24.39	1
683	31	2	2	0	0	0	0	0	1	0	0	22.03	0
684	27	3	1	1	1	0	0	0	1	0	0	16.87	0
685	25	3	1	0	0	0	0	0	0	0	0	20.2	0
686	24	3	1	0	0	0	0	0	0	0	0	18.66	0
687	31	3	1	0	0	0	0	0	1	0	0	28.93	1
688	27	2	1	0	0	0	0	0	0	0	0	19.92	0
689	25	2	1	0	0	1	0	0	0	0	0	25.91	1
690	26	2	1	0	0	0	0	0	0	0	0	21.88	0
691	26	2	1	0	0	0	0	0	1	1	0	19.88	0
692	31	1	1	0	0	0	1	0	0	0	0	20.03	0
693	24	3	1	0	0	1	0	0	1	0	0	20.71	0
694	25	3	1	0	0	0	0	0	0	0	0	21.79	0
695	23	3	1	0	1	0	0	0	0	0	0	20.7	0
696	31	3	1	0	1	0	0	0	0	0	0	19.53	0
697	26	3	1	0	0	1	0	0	0	0	0	20.43	0
698	25	3	1	0	0	0	0	0	0	0	0	26.71	1
699	34	1	2	1	1	0	0	0	1	0	0	23.34	0
700	26	3	2	0	0	0	0	0	0	0	0	18	0
701	25	3	1	0	0	1	0	0	2	0	0	25.39	1
702	24	3	1	0	1	0	0	0	0	0	0	21.78	0
703	34	1	1	0	0	0	0	0	0	0	0	16.65	0
704	29	3	1	0	0	0	0	0	0	0	0	21.08	0
705	26	2	1	0	0	0	0	0	0	0	0	16.41	0
706	31	3	2	0	0	0	0	0	1	0	0	27.01	1
707	24	3	1	0	1	0	0	0	0	0	1	23.03	0
708	32	3	2	0	0	0	0	0	0	0	0	19.15	0
709	32	2	1	0	0	0	0	0	1	0	0	19.92	0
710	29	3	1	0	0	0	0	0	0	0	1	20.7	0
711	26	3	1	0	0	0	0	0	0	0	0	15.78	0
712	25	2	2	0	0	0	0	0	0	0	0	20.31	0
713	33	2	1	0	0	0	0	0	1	0	0	26.62	1
714	26	3	2	1	0	0	1	0	0	0	0	25.11	1
715	25	3	1	0	0	0	0	0	0	0	0	17.78	0
716	22	2	1	0	0	0	0	0	0	0	0	26.04	1
717	29	3	1	0	0	0	0	0	0	0	0	21.83	0
718	26	1	1	0	0	0	0	0	0	0	0	20.32	0
719	29	1	1	0	0	0	0	0	1	0	0	24.84	1
720	28	3	2	0	1	0	0	0	0	0	0	19.23	0
721	25	1	1	2	0	0	0	0	0	0	0	19.96	0
722	24	1	1	0	0	0	0	0	0	0	0	20.7	0
723	31	3	1	0	0	0	0	0	0	0	0	19.38	0
724	25	2	1	0	0	0	0	1	1	0	1	29.3	1
725	26	1	1	0	0	0	0	0	1	0	0	23.23	0
726	25	2	1	0	0	0	0	0	0	0	0	18.03	0
727	24	3	2	0	0	0	0	0	1	0	0	22.04	0
728	24	3	1	0	0	1	0	0	1	0	0	19.13	0
729	25	2	1	0	0	0	0	0	0	0	0	18.75	0
730	27	3	1	0	0	1	0	0	0	0	0	23.01	0
731	26	3	1	0	0	0	0	1	0	0	0	18.07	0
732	23	2	1	0	0	0	0	0	1	0	0	16.65	0
733	25	2	1	0	0	0	0	0	0	0	0	20.2	0
734	31	3	1	0	0	0	0	0	1	0	0	19.22	0
735	27	2	1	0	0	0	0	0	0	0	0	18.65	0
736	27	2	1	0	0	0	0	0	0	0	0	20.42	0
737	26	1	1	0	0	0	0	0	0	0	0	25.08	1
738	25	3	1	0	0	0	0	0	0	0	0	19.49	0
739	27	2	1	0	0	0	0	0	0	0	0	16.82	0
740	27	3	1	0	0	0	1	0	1	0	0	20.8	0
741	28	3	1	0	0	0	0	0	0	0	0	19.6	0
742	29	2	1	0	0	0	0	1	0	0	0	22.89	0
743	31	3	1	0	0	1	0	0	0	0	0	20.03	0
744	29	3	1	0	1	0	0	0	1	0	0	19.05	0
745	35	3	1	0	0	0	0	0	1	0	0	18.02	0
746	24	1	1	0	0	1	0	1	0	0	0	19.29	0
747	29	2	1	2	0	0	0	0	1	0	0	19.63	0
748	27	3	1	0	0	0	0	0	1	0	0	24.8	1
